# Supplementary material for: Catalytic graphitization assisted synthesis of Fe3C/Fe/graphitic carbon with advanced pseudocapacitance
Source: Royal Society of Chemistry journal article supplement (doi:10.1039/d1ra08834c), 2022-01-01
Supplement: d1ra08834c1.pdf [file d1ra08834c1.pdf]

**Supporting Information**

**Catalytic graphitization assisted synthesis of Fe<sub>3</sub>C/Fe/graphitic  
carbon with advanced pseudocapacitance**

Aoping Guo, Xiaobao Zhang, Baiyi Shao, Song Sang, Xiaojing Yang\*

Beijing Key Laboratory of Energy Conversion and Storage Materials, College of  
Chemistry, Beijing Normal University, No. 19, Xijiekouwai Street, Haidian District,  
Beijing 100875, China.

\* Corresponding authors.

E-mail: yang.xiaojing@bnu.edu.cn (X. Yang)

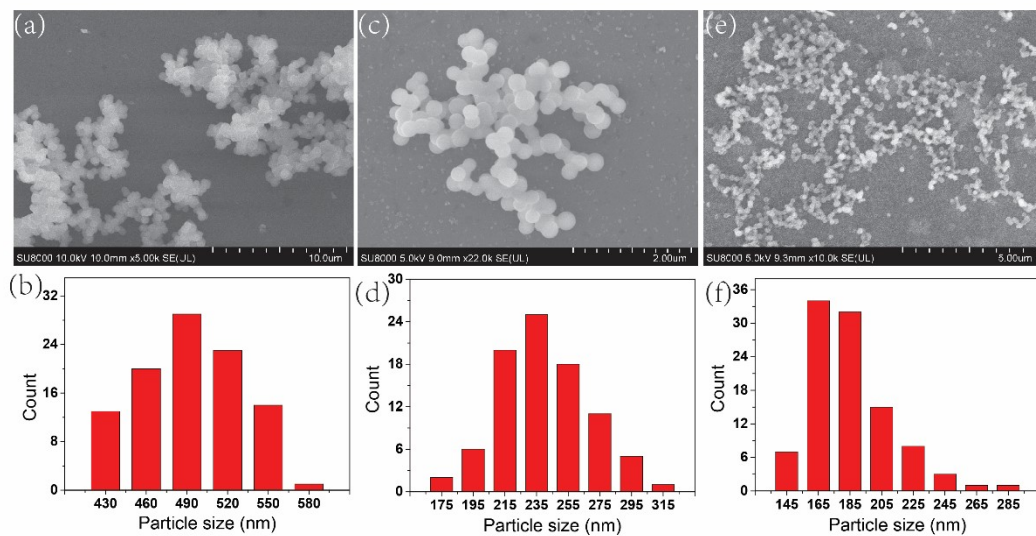

Fig. S1 SEM images and particle size distributions of carbon spheres obtained from hydrothermal carbonization of glucose (a-b) 1 M, 200 °C, 10 h; (c-d) 1 M, 180 °C, 10 h; (e-f) 0.5 M, 180 °C, 10 h.

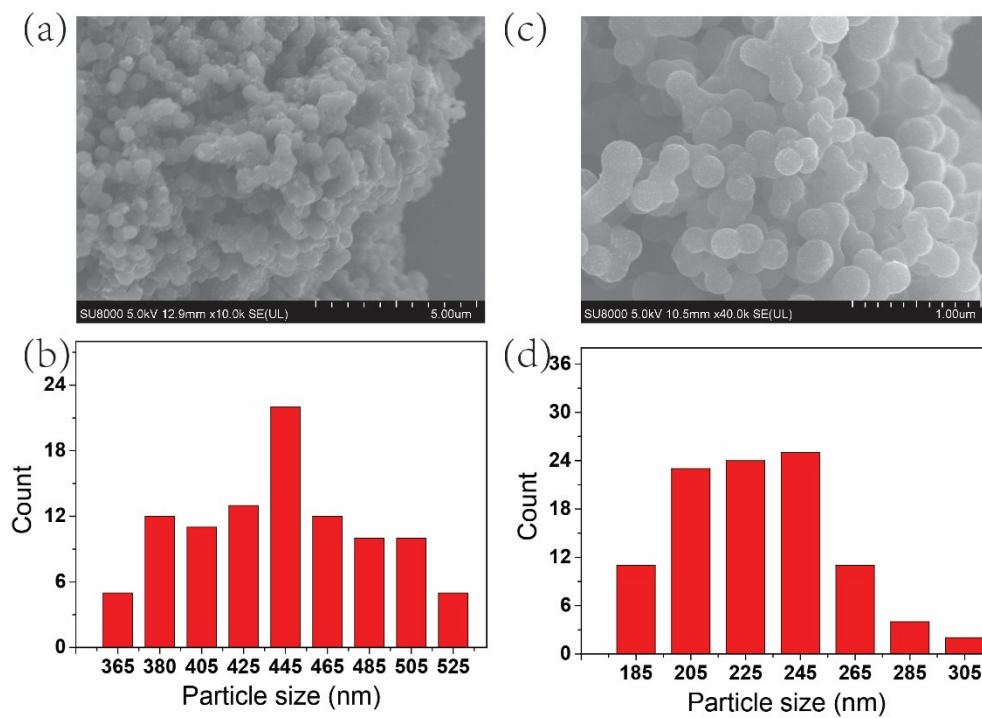

Fig. S2 SEM images and particle size distributions of (a-b) FC-1-8; (c-d) FC-1-8-HCl.

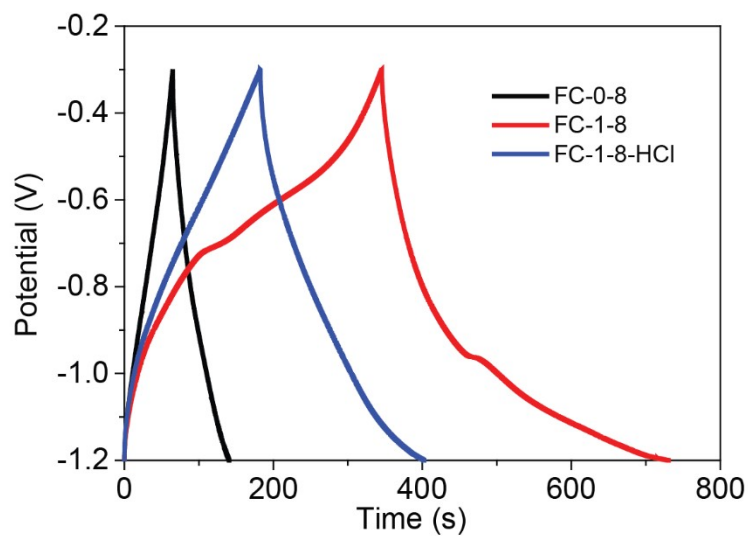

Fig. S3 GCD curves of FC-0-8, FC-1-8 and FC-1-8-HCl at  $1 \text{ A g}^{-1}$ .

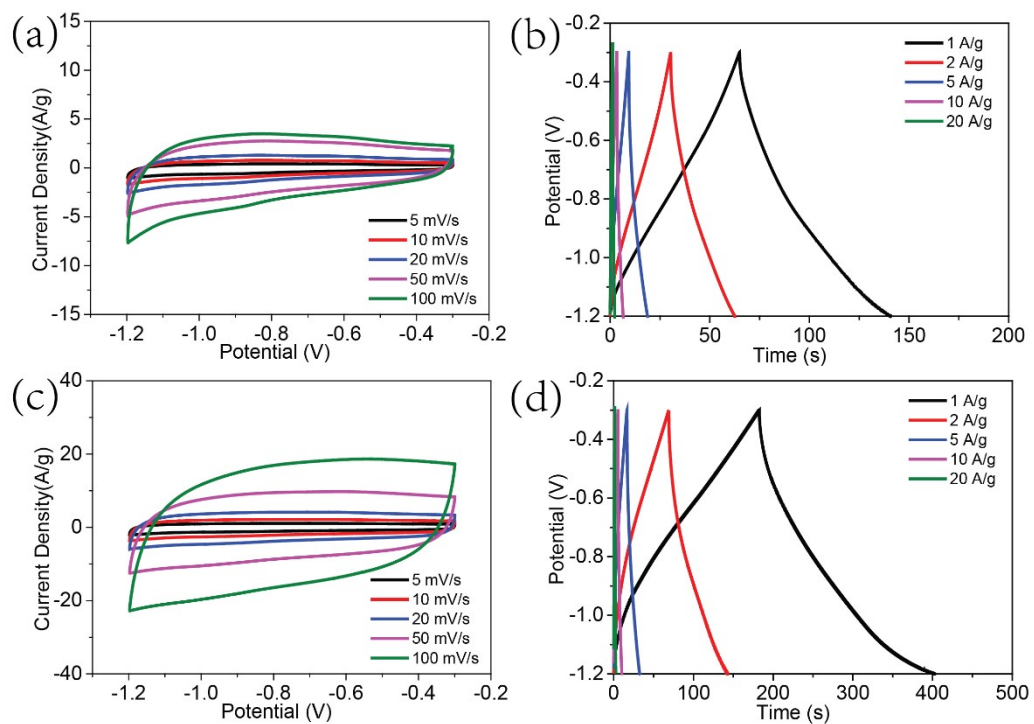

Fig. S4 CV and GCD curves of FC-0-8 (a-b) and FC-1-8-HCl (c-d).

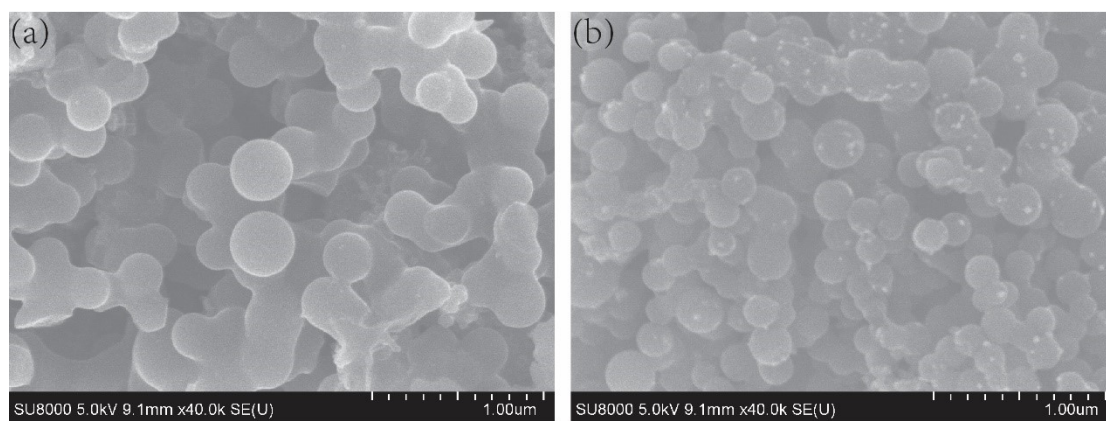

Fig. S5 SEM images of (a) FC-1-8 and (b) FC-1-8-HCl samples after electrochemical activation.
